# Supplementary material for: Menstruation-Related School Absenteeism: An Urban Centre Study in the Northern Region of Ghana
Source: MDPI journal article supplement (doi:10.3390/women3040038), 2023-11-01
Supplement: s1 [file s1]

***Section A: Socio demographic characteristics***

1. Age (a) Below 15 years [ ] (b) 15 to 19 years [ ] (c) 20 to 24 years [ ] (d) 25 to 29 years [ ]
2. Which class are you? (a) JHS 1 [ ] (b) JHS 2 [ ] (c) JHS 3 [ ]
3. What is your Ethnicity? (a) Dagomba [ ] (b) Gonja [ ] (c) Mamprusi [ ] (d) other specify.....
4. What is your religion? (a) Christianity [ ] (b) Islam [ ] (c) Traditionalist [ ] (d) Others please specify\_\_\_\_\_
5. Category of school? (a) Public [ ] (b) Private [ ]
6. Whom do you live with at present?  
(a) With my mother and father [ ] (b) With my mother only [ ] (c) With my father only [ ] (d) With relatives [ ] (e) With friends [ ] (f) Other(specify)\_\_\_\_\_
7. What is your father's educational level?  
(a) No formal Education [ ] (b) Basic education [ ] (c) Secondary school [ ] (d) College diploma and above [ ]
8. What is your mother's educational level?  
(a) No formal Education [ ] (b) Basic education [ ] (c) Secondary school [ ] (d) College diploma and above [ ]
9. Category of employment of mother? Self employed [ ] Unemployed [ ] Public sector employment [ ] Private sector employment [ ]
10. Category of employment of father? Self employed [ ] Unemployed [ ] Public sector employment [ ] Private sector employment [ ]

***Section B: Practices of managing menstrual hygiene among adolescent school girls***

11. Do you use absorbent material during period or menses? (a) Yes [ ] (b) No [ ]
12. What absorbent material do you use mostly during menstruation? (a) Commercially made sanitary pad [ ] (b) Tissue paper [ ] (c) Cloth [ ] (d) Other(specify)\_\_\_\_\_
13. Do you reuse absorbent materials? (a) Yes [ ] (b) No [ ]
14. Place of pad store (absorbent materials) in between use? (a) In the bath room [ ] (b) With other cloth [ ] (c) Separately [ ] (d) Others specify\_\_\_\_\_
15. If you are using absorbent material, how do you clean it? (a) Soap & water [ ] (b) Only water [ ] (c) Other (Specify): \_\_\_\_\_
16. Where do you dry the absorbent material? (a) Sunlight [ ] (b) Inside the room [ ] (c) Other (Specify)\_\_\_\_\_
17. How many times do you change the cloth/pad in a day? A. Three and more [ ] (b) Once [ ] (c) Twice [ ]
18. Where do you dispose your pads? (a) Dustbin [ ] (b) Drain [ ] (c) Toilet [ ] (d) Open field [ ] (e) Other (specify)\_\_\_\_\_
19. Types of pads wrap used for disposing it? (a) Papers [ ] (b) Plastic bag [ ] (c) Not wrap [ ] (d) Other (Specify)\_\_\_\_\_
20. Do you bath during menses? (a) Yes [ ] (b) No [ ] (Skip next question if No)
21. How often do you bath during Menstruation/Period? (a) Daily [ ] (b) Twice daily [ ] (c) Three times a day [ ] (d) More than three times a day [ ] (e) Until the end of my periods [ ] (f) Others (Specify)
22. What do you use to clean your genital (private part) during your menses? (a) Water and soap [ ] (b) Only with water [ ] (c) Tissue paper [ ] (d) Towel [ ] (e) Other (Specify)\_\_\_\_\_

***Section D: School absenteeism during menstruation***

23. Have you ever absented yourself from school due to menstruation? (a) Yes ☐ (b) No ☐
24. How many days did you absent yourself from school? (a) 1 ☐ (b) 2 ☐ (c) 3 ☐ (d) 4 ☐ (e) others
25. What are some of the problems for your absent? (Tick all applicable) (a) Pains ☐ (b) Staining dress ☐ (c) Shyness ☐ (d) Stigma ☐ (e) Other specify.....
26. Do you have concentration problems in class during menstruation? (a) Yes ☐ (b) No ☐
27. Are you able to partake in all school activities during menstruation? (a) Sometimes ☐ (b) Always ☐ (c) Others ☐
28. Is there enough time in breaks for change of menstrual item? (a) Yes ☐ (b) No ☐
29. Are you able to leave class to wash in case of a leak? (a) Yes ☐ (b) No ☐
